# Supplementary material for: Transcription factor activity rhythms and tissue-specific chromatin interactions explain circadian gene expression across organs
Source: PubMed Central journal article supplement (PMC5793782; doi:10.1101/gr.222430.117), 2018-02
Supplement: supp_gr.222430.117_Supplemental_Fig_S2.pdf [file supp_gr.222430.117_Supplemental_Fig_S2.pdf]

# Supplemental Figure S2

**A**

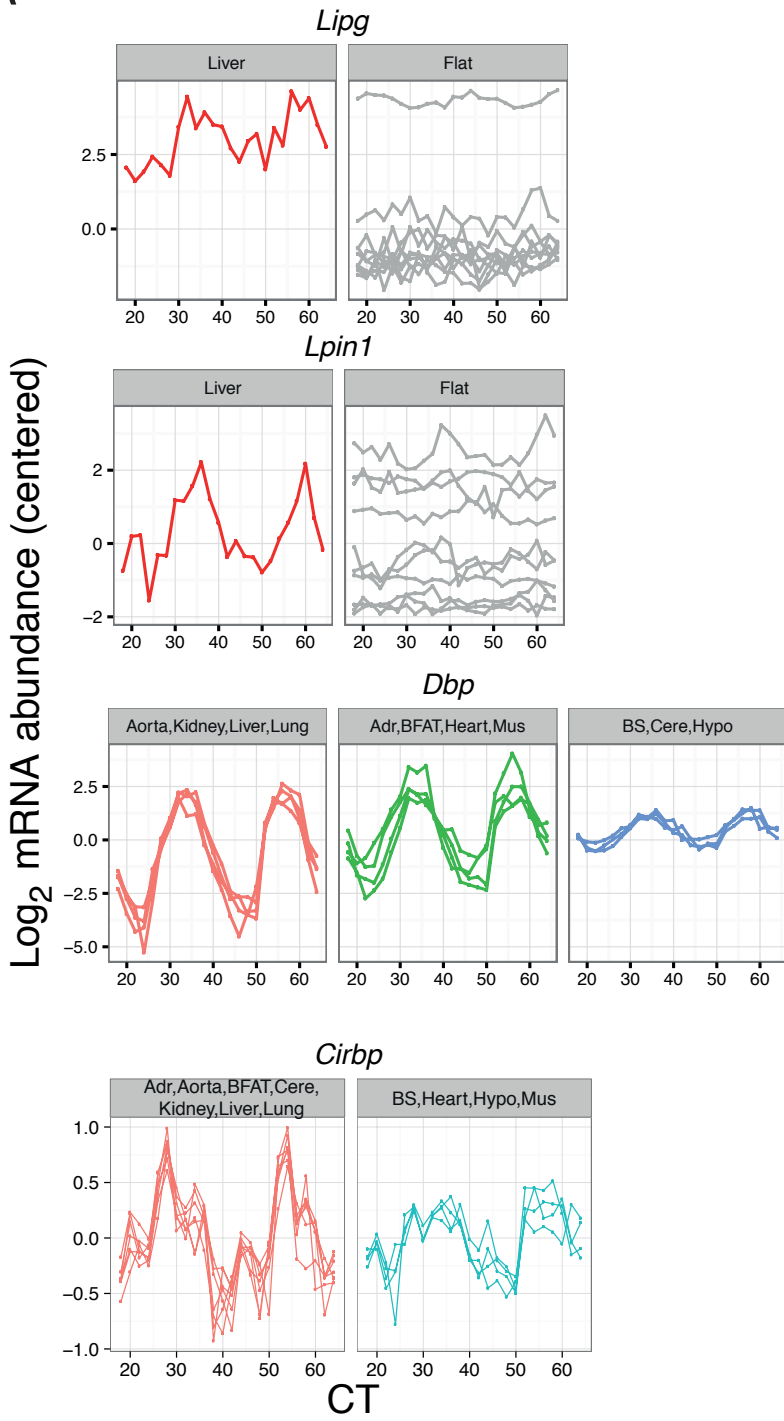

**B**

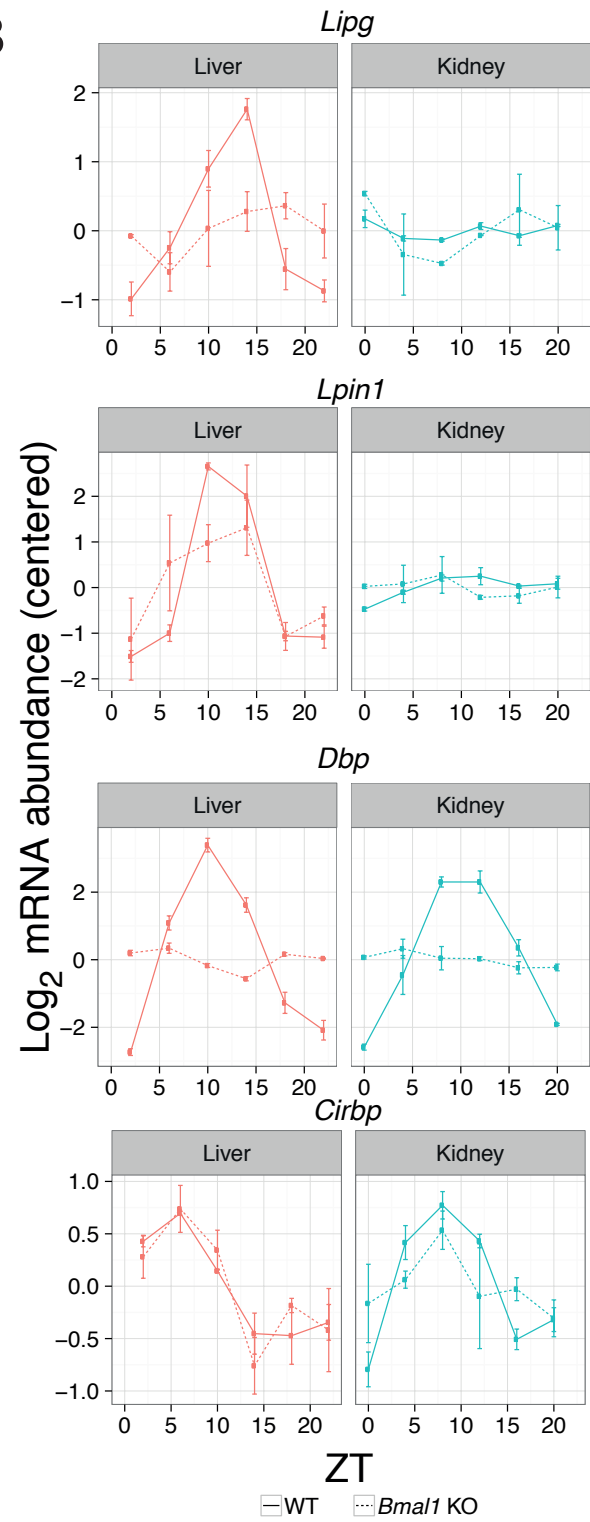

**Supplemental Figure S2 – Temporal profiles of mRNA accumulation across tissues and in clock-disrupted conditions**

(A) Examples of genes whose expression is rhythmic in different combinations of tissues. Flat indicates nonrhythmic tissues. Rhythms can be further classified as clock- or system-driven by analysis in WT and *Bmal1* KO data, shown in (B).

(B) Examples of tissue-specific (*Lipg*, *Lpin1*) and tissue-wide (*Dbp*, *Cirbp*) genes whose oscillations can be clock-dependent (*Lipg*, *Dbp*) or -independent (*Lpin1*, *Cirbp*) manner.
