# Supplementary material for: Transcription factor activity rhythms and tissue-specific chromatin interactions explain circadian gene expression across organs
Source: PubMed Central journal article supplement (PMC5793782; doi:10.1101/gr.222430.117), 2018-02
Supplement: supp_gr.222430.117_Supplemental_Fig_S9.pdf [file supp_gr.222430.117_Supplemental_Fig_S9.pdf]

# Supplemental Figure S9

## *Slc45a3*

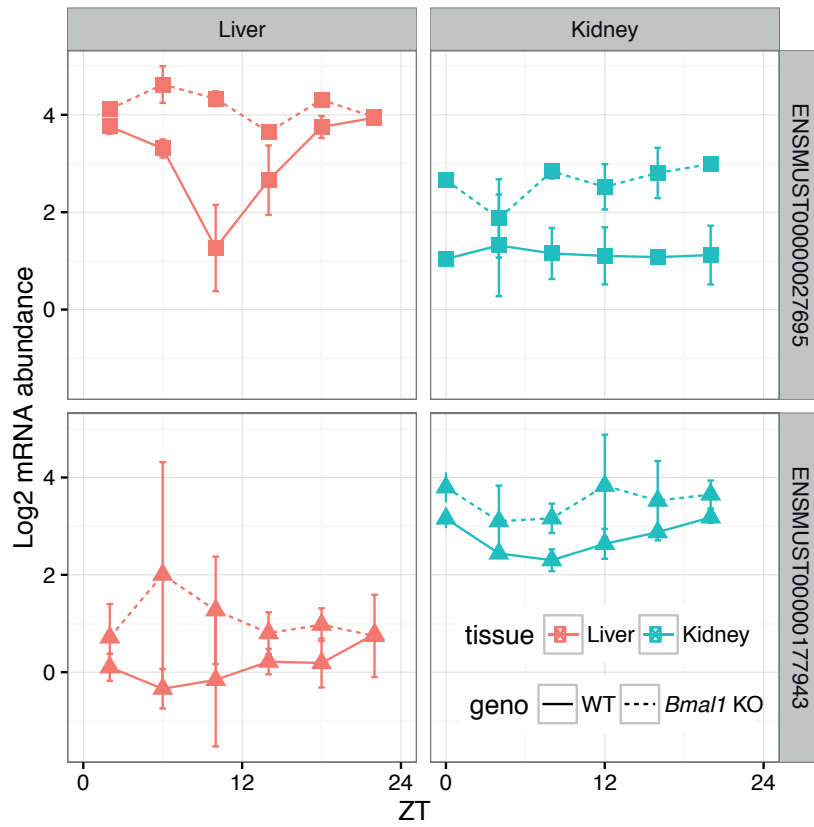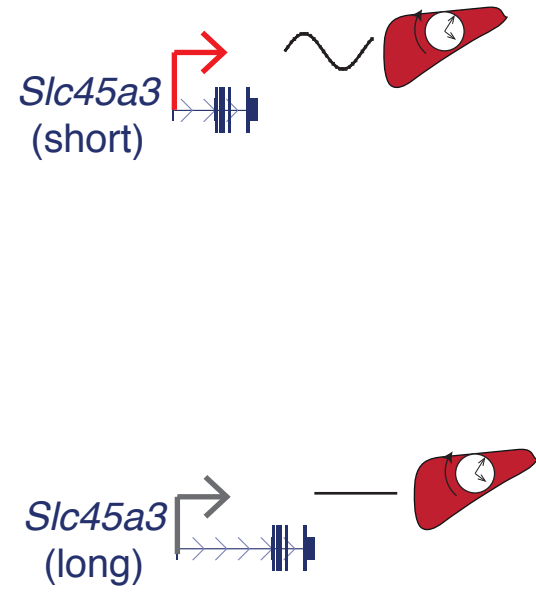

**Supplemental Figure S9 — Liver and kidney use different TSSs in *Slc45a3*, a clock-driven liver transcript**

Temporal abundance profiles of two transcripts of *Slc45a3* in liver and kidney of mice with and without a functioning clock. *Slc45a3*-short isoform is rhythmic specifically in the liver; *Slc45a3*-long isoform is not robustly rhythmic in liver or kidney.
